# Supplementary material
Source: PubMed Central journal article supplement (PMC4655155)
Supplement: NIHMS728127-supplement-1.pdf [file NIHMS728127-supplement-1.pdf]

**Supplement Table 1.** Oligonucleotide primers used for quantitative real-time PCR analysis.

| <b>Gene</b> | <b>Forward</b>               | <b>Reverse</b>               |
|-------------|------------------------------|------------------------------|
| GAPDH       | 5'- ACATCGCTCAGACACCATG      | 5'- TGTAGTTGAGGTCAATGAAGGG   |
| IL4         | 5'- AGCTGATCCGATTCCTGAAAC    | 5'- AACGTA CTCTGGTTGGCTTC    |
| IL6         | 5'- CCACTCACCTCTTCAGAACG     | 5'- CATCTTTGGAAGGTT CAGGTTG  |
| IL8         | 5'- A TACTCCAAACCTTTCCACCC   | 5'- TCTGCACCCAGTTTTCTTG      |
| IL10        | 5'- CGCATGTGAACTCCCTGG       | 5'- TAGATGCCTTTCTCTGGAGC     |
| IL12        | 5'- CACATTCCTACTTCTCCCTGAC   | 5'- CTGAGGTCTTGCCGTGAAG      |
| IL13        | 5'- AACATCACCCAGAACCAGAAG    | 5'- ACACGTTGATCAGGGATTCC     |
| IL18        | 5'- CATTGACCAAGGAAATCGGC     | 5'- CACAGAGATAGTTACAGCCATACC |
| IFNG        | 5'- GCATCGTTTTGGGTTCTCTTG    | 5'- AGTTCCATTATCCGCTACATCTG  |
| TNF         | 5'- ACTTTGGAGTGATCGGCC       | 5'- GCTTGAGGGTTTGCTACAAC     |
| DC-SIGN     | 5'- CCTGGATGGGACTTTCAGATC    | 5'- GCCATTGCCACTAAATTCCG     |
| DECTIN-1    | 5'- ACAAGTGTCTTCCCAACCTG     | 5'- TGGAGATGGGTTTTCTTGGG     |
| DECTIN-2    | 5'- TGAAGAGAAGGTTTGGTCTAAGAG | 5'- AGCCCCAGAAAATAAGAAAATGAC |
| LANGERIN    | 5'- GACTAAAGCAGGGATGGAAGG    | 5'- TGAGGGAGCCTTTATATTGCC    |
| MCL         | 5'- ACGGCTTTCCTATTTCTTGG     | 5'- TGAGAGTTGTCTGGGTTTCATTC  |
| MINCLE      | 5'- GGTGTGTCGAGGGTCAGTG      | 5'- TGCCTTGGGTTTGAAGAGTC     |
| IL4         | 5'- AGCTGATCCGATTCCTGAAAC    | 5'- AACGTA CTCTGGTTGGCTTC    |
| CXCL1       | 5'- AACCGAAGTCATAGCCACAC     | 5'- CCTCCCTTCTGGTCAGTTG      |
| CXCL2       | 5'- AACCGAAGTCATAGCCACAC     | 5'- CTTCTGGTCAGTTGGATTGTC    |
| CXCL3       | 5'- AAGTGTGAATGTAAGGTCCCC    | 5'- GTGCTCCCCTTGTT CAGTATC   |

## Supplement Figure 1.

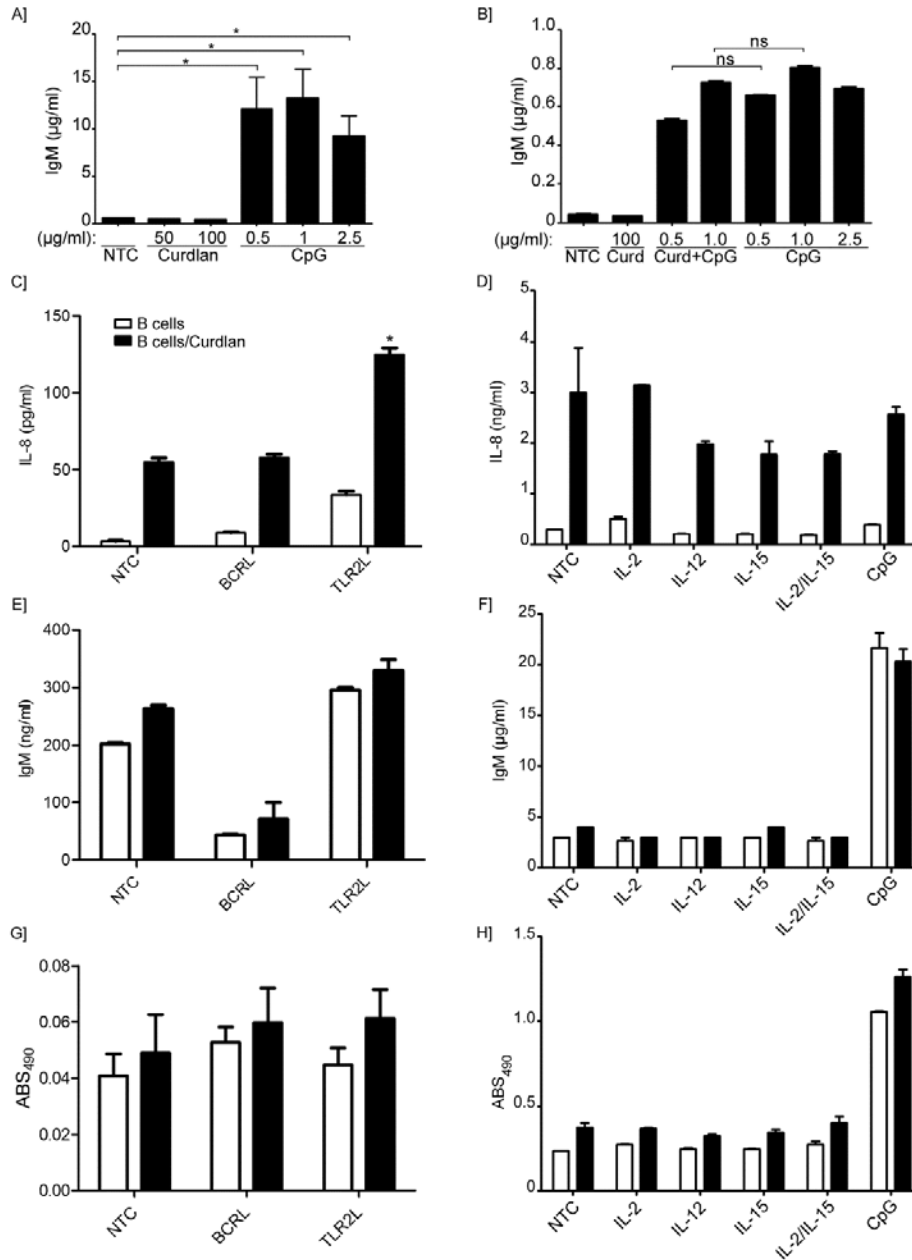

**B-lymphocyte responses to co-stimulatory signals. A and B)** IgM measured by ELISA in the supernatants of NTC or B-lymphocytes stimulated as indicated. \**p*<0.0001. **C-F)** IL-8 and IgM were measured in the supernatants of NTC or treated cells as indicated. Pam3CSK4 (TLR2L) was from Invivogen (San Diego, CA) and BCRL is a Fab<sup>2</sup> anti human IgA/G/M from Jackson ImmunoResearch (West Grove, PA). IL-2, IL-12, IL-15 cytokines were a gift from Dr. Diane F. Jelinek (Mayo Clinic, Phoenix, AZ). **G and H)** B-lymphocyte proliferation was measured by XTT proliferation assay. \**p*<0.01 when compared with TLR2L stimulation alone or β-glucan stimulated cells.

Supplement Figure 2.

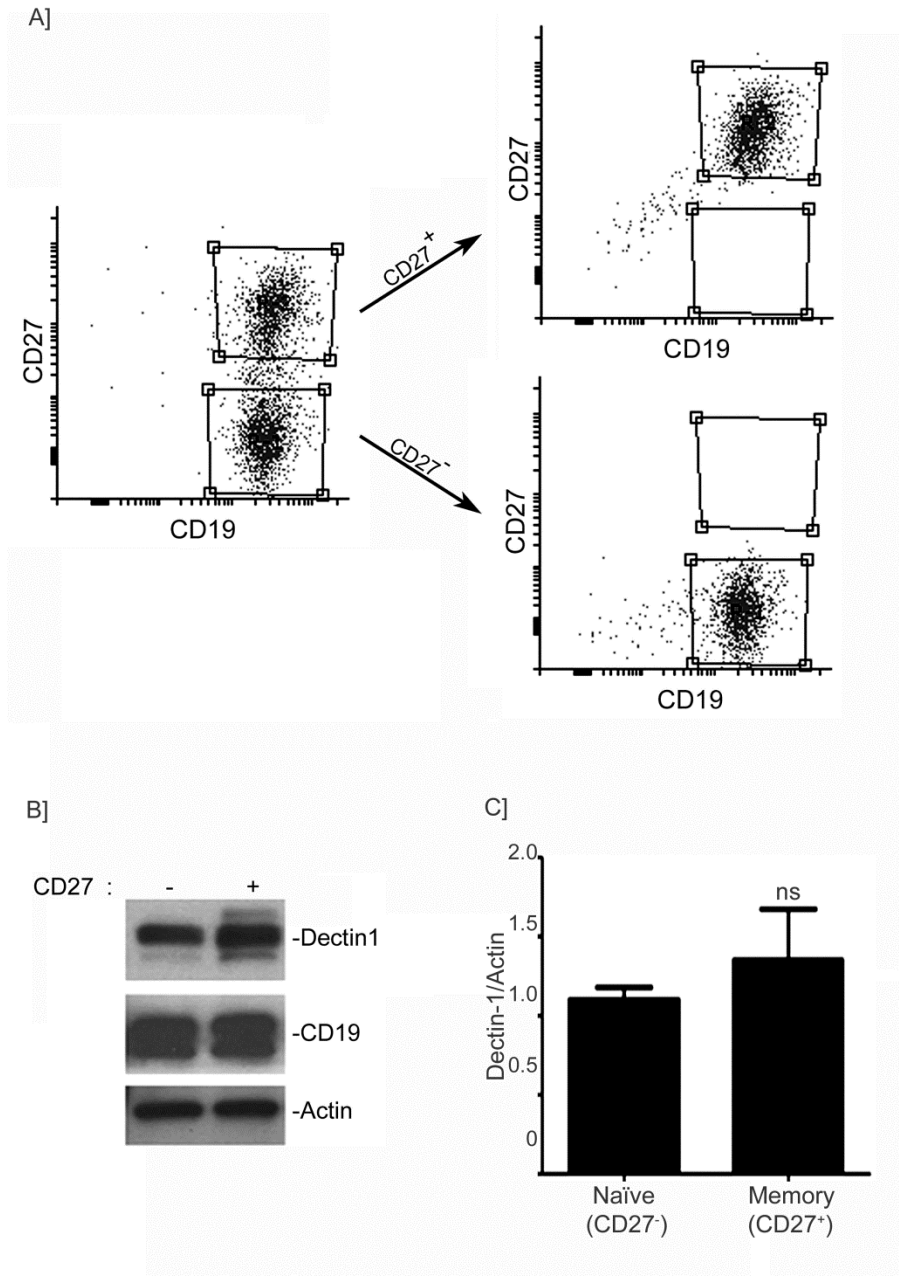

**Dectin-1 expression in naïve and memory cells.** **A)** Flow cytometry showing the sorting of human CD19<sup>+</sup> B-lymphocytes into naïve (CD27<sup>-</sup>) and memory (CD27<sup>+</sup>) B-lymphocytes. Antibodies used were mouse anti-human CD27-APC-Vio770 and mouse anti-human CD19-PE from Miltenyi Biotec (San Diego, CA). **B and C)** Dectin-1 protein expression and quantification in naïve and memory B-lymphocytes. CD19 antibody used for western blot was a rabbit anti-human CD19 (GeneTex, Irvine, CA). Western blots were quantified using ImageJ software.

### Supplement Figure 3.

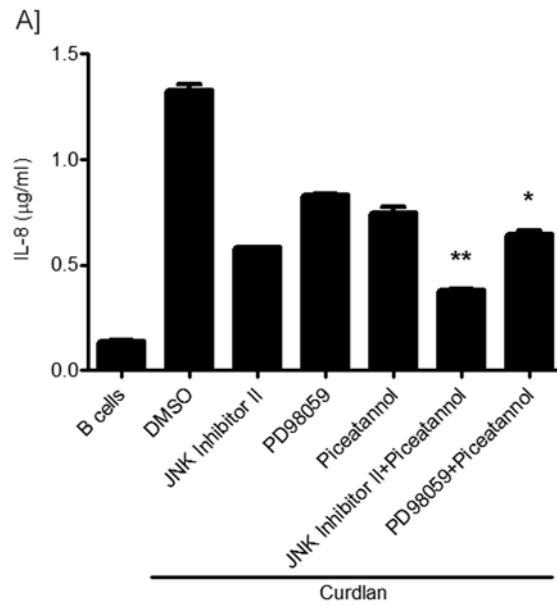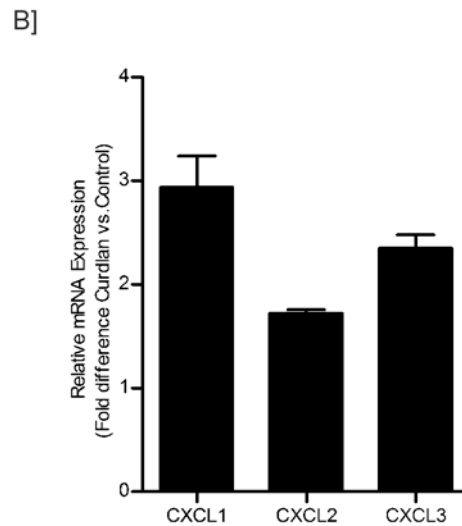

**Curdlan mediated cell signaling and chemokine expression.** **A)** IL-8 was measured in the cell supernatant of NTC and curdlan-stimulated B-lymphocytes. Cells were pretreated for 1 hour as indicated.  $**p < 0.0001$  and  $*p < 0.01$  when compared with each inhibitor alone. **B)** Quantitative PCR analysis showing relative mRNA expression of chemokines after 24 hour stimulation of B-lymphocytes by curdlan.
